# Supplementary material for: Game for Brainstorm: The Impact of a Badge System on Knowledge Sharing
Source: Atypon-hosted journal article supplement (doi:10.1287/isre.2023.0091), 2025-07-28
Supplement: isre.2023.0091.sm1.pdf [file isre.2023.0091.sm1.pdf]

## Online Appendix A. Selected Recent Gamification Literature

**Table A.1 Selected Recent Literature of Gamification**

| <b>Reference</b>        | <b>Gamification Elements</b>      | <b>Interested Outcomes</b>         | <b>Methodology</b>                                 | <b>Design Improvement</b> |
|-------------------------|-----------------------------------|------------------------------------|----------------------------------------------------|---------------------------|
| This study              | Badge: Volume, Variety, & Valence | Contribution Quantity & Quality    | Structural HMM with Copula Endogeneity Correlation | Counterfactual Strategies |
| Chen et al. (2018)      | Badge: Volume                     | Contribution Quantity              | Structural HMM                                     |                           |
| Cavusoglu et al. (2015) | Badge: Variety or Valence         | Contribution Quantity              | Regressions                                        |                           |
| Ho et al. (2022)        | Badge: Variety<br>Leaderboard     | Shopping Engagement                | Field Experiment & Survey                          |                           |
| Leung et al. (2023)     | Badge: Variety<br>Leaderboard     | Learning Engagement and Test Score | Field Experiment                                   |                           |
| Hydari et al. (2023)    | Leaderboard                       | Daily Steps Count                  | Field Experiment & Survey                          |                           |
| Bojd et al. (2022)      | Leaderboard                       | Weight Loss                        | Regressions                                        |                           |

## Online Appendix B. Correlation of Key Variables

**Table B.1. Correlations of Key Variables**

|                    | <i>Volume</i> | <i>Variety</i> | <i>Valence</i> | <i>Tenure</i> | <i>AvgAnswer</i> | <i>AvgQuestion</i> |
|--------------------|---------------|----------------|----------------|---------------|------------------|--------------------|
| <i>Volume</i>      | 1.00          | -0.058         | 0.504          | 0.423         | 0.608            | 0.293              |
| <i>Variety</i>     |               | 1.000          | -0.063         | 0.034         | -0.044           | 0.420              |
| <i>Valence</i>     |               |                | 1.000          | 0.017         | 0.523            | 0.018              |
| <i>Tenure</i>      |               |                |                | 1.000         | -0.071           | -0.028             |
| <i>AvgAnswer</i>   |               |                |                |               | 1.000            | -0.032             |
| <i>AvgQuestion</i> |               |                |                |               |                  | 1.000              |

## Online Appendix C. Prior Distributions and Model Estimation

For all parameters in our model, we use vague priors to minimize the impact of prior distributions. For the parameters  $\eta$ ,  $\alpha_s$ ,  $\beta$ ,  $\beta^a$ ,  $\zeta_s$ ,  $\xi_s$  and  $\xi_s^a$ , we assume a normal prior with a mean of 0 and a variance of 1000:

$$\eta_s \sim N(0,1000), \alpha_s \sim N(0,1000), \beta_s \sim N(0,1000), \beta_s^a \sim N(0,1000),$$

$$\zeta_s \sim N(0,1000), \xi_s \sim N(0,1000), \xi_s^a \sim N(0,1000), s = 1, 2, \dots, S.$$

For the individual parameters  $\beta_{i0}$  and  $\beta_{i0}^*$ , the following prior distributions are used:

$$\beta_{i01} = \Delta_{i1} \sim N(\bar{\Delta}_1, \sigma_{\Delta_1}^2)$$

$$\beta_{i01}^a = \Delta_{i1}^a \sim N(\bar{\Delta}_1^a, \sigma_{\Delta_1^a}^2)$$

For  $s = 2, \dots, S$ ,

$$\beta_{i0s} = \beta_{i0s-1} + \exp(\Delta_{is}), \quad \Delta_{is} \sim N(\bar{\Delta}_s, \sigma_{\Delta_s}^2),$$

$$\beta_{i0s}^a = \beta_{i0s-1}^a + \exp(\Delta_{is}^a), \quad \Delta_{is}^a \sim N(\bar{\Delta}_s^a, \sigma_{\Delta_s^a}^2),$$

$$\bar{\Delta}_s \sim N(0,1000), \quad \sigma_{\Delta_s}^2 \sim \text{InvGamma}(0.01, 0.01), \quad s = 1, \dots, S$$

$$\bar{\Delta}_s^a \sim N(0,1000), \quad \sigma_{\Delta_s^a}^2 \sim \text{InvGamma}(0.01, 0.01), \quad s = 1, \dots, S$$

For the individual transition threshold  $\mu_{irj}$ , the following prior distributions are used:

$$\mu_{i11} = \delta_{i11} \sim N(\bar{\delta}_{11}, \sigma_{\delta_{11}}^2)$$

$$\mu_{iS2} = \delta_{iS2} \sim N(\bar{\delta}_{S2}, \sigma_{\delta_{S2}}^2)$$

For  $r = 2, \dots, S - 1$ ,

$$\mu_{ir1} = \delta_{ir1} \sim N(\bar{\delta}_{r1}, \sigma_{\delta_{r1}}^2)$$

$$\mu_{ir2} = \delta_{ir1} + \exp(\delta_{ir2}), \quad \delta_{ir2} \sim N(\bar{\delta}_{r2}, \sigma_{\delta_{r2}}^2),$$

$$\bar{\delta}_{rj} \sim N(0, 1000), \quad \sigma_{\delta_{rj}}^2 \sim \text{InvGamma}(0.01, 0.01), \quad r = 1, 2, \dots, S, \quad j = 1, 2.$$

Lastly, for the prior distribution on correlation matrix  $\Gamma_r$  in Gaussian copula model, we follow Liechty et al. (2004) and assume a normal prior  $N(0, 1)$  on correlation coefficients:

$$\pi(\Gamma_1, \Gamma_2, \dots, \Gamma_S) = c^* \prod_{i < j} \exp\left\{-\frac{\gamma_{ij}^2}{2}\right\} \prod_{r=1}^S \prod_{j=1}^J \exp\left\{-\frac{p_{rj}^2}{2}\right\} \cdot \prod_{r=1}^S I_{\{\Gamma_r \in \mathcal{R}\}}$$

where  $\mathcal{R}$  is the space of all correlation matrices of dimension  $J + 1$ , and

$$c^{*-1} = \int_{\Gamma_1, \Gamma_2, \dots, \Gamma_S \in \mathcal{R}} \prod_{i < j} \exp\left\{-\frac{\gamma_{ij}^2}{2}\right\} d\gamma_{ij} \cdot \prod_{r=1}^S \prod_{j=1}^J \exp\left\{-\frac{p_{rj}^2}{2}\right\} dp_{rj},$$

We devise a Markov Chain Monte Carlo (MCMC) algorithm to estimate the proposed HMM. We sample all parameters iteratively using either the random-walk Metropolis-Hasting algorithm (Chibs and Greenburg 1995) or the Gibbs sampling (Gelfand 2000). For Gibbs update, we generate the random variable from its full conditional distribution. For Metropolis-Hasting update, we generate the proposal draw either from a normal distribution or uniform distribution and then we accept the new draw with probability  $\min\left\{1, \frac{f(y_{it}, y_{it}^a | \theta_j^{\text{new}}, \theta_{-j}) \pi(\theta_j^{\text{new}})}{f(y_{it}, y_{it}^a | \theta_j^{(t-1)}, \theta_{-j}) \pi(\theta_j^{(t-1)})}\right\}$ , where  $f(\cdot)$  is the likelihood function of the proposed model.

To increase the efficiency of estimation, we use collapsed Gibbs sampler to first sample correlation coefficients  $P_r$  ( $r = 1, 2, \dots, S$ ) before sampling the latent states. Then, we sample latent states and update the rest of the parameters accordingly. Our MCMC algorithm is implemented as follows:

- 1) Sample  $P_r$ ,  $r = 1, 2, \dots, S$  using the Metropolis-Hasting update.
- 2) Sample  $S_{it}$ ,  $i = 1, 2, \dots, n$ ,  $s = 1, 2, \dots, S$ , using forward-backward recursions (Scott, 2002).
- 3) Sample  $\Gamma$  using the Metropolis-Hasting update.
- 4) Sample  $\alpha_s, \zeta_s, \tau_{ts}$   $s = 1, 2, \dots, S$  using the Metropolis-Hasting update.
- 5) Sample  $\beta_s, \xi_s$ ,  $s = 1, 2, \dots, S$  using the Metropolis-Hasting update.

- 6) Sample  $\beta_s^*, \xi_s^*$   $s = 1, 2, \dots, S$  using the Metropolis-Hasting update.
- 7) Sample  $\eta_s$ ,  $s = 1, 2, \dots, S$  using the Metropolis-Hasting update.
- 8) Sample  $\delta_{irj}$ ,  $i = 1, 2, \dots, n$ ,  $r = 1, 2, \dots, S$ ,  $j = 1, 2$  using the Metropolis-Hasting update.
- 9) Sample  $\Delta_{is}$ ,  $i = 1, 2, \dots, n$ ,  $s = 1, 2, \dots, S$  using the Metropolis-Hasting update.
- 10) Sample  $\Delta_{is}^a$ ,  $i = 1, 2, \dots, n$ ,  $s = 1, 2, \dots, S$  using the Metropolis-Hasting update.
- 11) Sample  $\bar{\delta}_{rj}$  and  $\sigma_{\delta_{rj}}^2$ ,  $r = 1, 2, \dots, S$ ,  $j = 1, 2$  using the Gibbs update:

$$\sigma_{\delta_{rj}}^2 \sim \text{InvGamma} \left( 0.01 + \frac{n}{2}, 0.01 + \frac{\sum_{i=1}^n (\delta_{irj} - \bar{\delta}_{rj})^2}{2} \right)$$

$$\bar{\delta}_{rj} \sim N \left( \frac{1000 * \sum_{i=1}^n \delta_{irj}}{\sigma_{\delta_{rj}}^2 + n * 1000}, \frac{1000 * \sigma_{\delta_{rj}}^2}{\sigma_{\delta_{rj}}^2 + n * 1000} \right)$$

- 12) Sample  $\bar{\Delta}_s$  and  $\sigma_{\Delta_s}^2$ ,  $s = 1, 2, \dots, S$  using the Gibbs update:

$$\sigma_{\Delta_s}^2 \sim \text{InvGamma} \left( 0.01 + \frac{n}{2}, 0.01 + \frac{\sum_{i=1}^n (\Delta_{is} - \bar{\Delta}_s)^2}{2} \right)$$

$$\bar{\Delta}_s \sim N \left( \frac{1000 * \sum_{i=1}^n \Delta_{is}}{\sigma_{\Delta_s}^2 + n * 1000}, \frac{1000 * \sigma_{\Delta_s}^2}{\sigma_{\Delta_s}^2 + n * 1000} \right)$$

- 13) Sample  $\bar{\Delta}_s^a$  and  $\sigma_{\Delta_s^a}^2$ ,  $s = 1, 2, \dots, S$  using Gibbs update:

$$\sigma_{\Delta_s^a}^2 \sim \text{InvGamma} \left( 0.01 + \frac{n}{2}, 0.01 + \frac{\sum_{i=1}^n (\Delta_{is}^a - \bar{\Delta}_s^a)^2}{2} \right)$$

$$\bar{\Delta}_s^a \sim N \left( \frac{1000 * \sum_{i=1}^n \Delta_{is}^a}{\sigma_{\Delta_s^a}^2 + n * 1000}, \frac{1000 * \sigma_{\Delta_s^a}^2}{\sigma_{\Delta_s^a}^2 + n * 1000} \right)$$

## References

- Chib S, Greenberg E (1995) Understanding the Metropolis-Hastings Algorithm. The American Statistician 49(4):327-335.
- Gelfand AE (2000) Gibbs Sampling. Journal of the American Statistical Association 95(452):1300-1304.
- Liu, J. S. (1994). The collapsed Gibbs sampler in Bayesian computations with applications to a gene regulation problem. Journal of the American Statistical Association, 89(427), 958-966.
- Liechty, J. C., Liechty, M. W., & Müller, P. (2004). Bayesian correlation estimation. Biometrika, 91(1), 1-14.
- Scott, S. L. (2002). Bayesian methods for hidden Markov models: Recursive computing in the 21st century. Journal of the American statistical Association, 97(457), 337-351.
